# Supplementary material for: A hydrophobic gelatin fiber sheet promotes secretion of endogenous vascular endothelial growth factor and stimulates angiogenesis
Source: Royal Society of Chemistry journal article supplement (doi:10.1039/d0ra03593a), 2020-01-01
Supplement: d0ra03593a1.pdf [file d0ra03593a1.pdf]

**A Hydrophobic Gelatin Fiber Sheet Promotes  
Secretion of Endogenous Vascular Endothelial  
Growth Factor and Stimulates Angiogenesis**

**Supporting Information**

*Yosuke Mizuno<sup>1</sup> and Tetsushi Taguchi<sup>1,2\*</sup>*

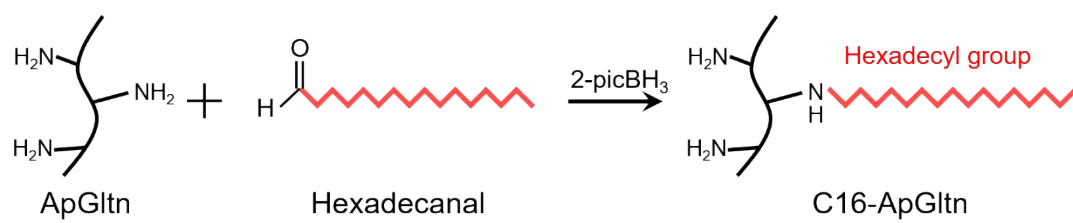

**Figure S1.** Synthesis of C16-ApGln by reductive amination.

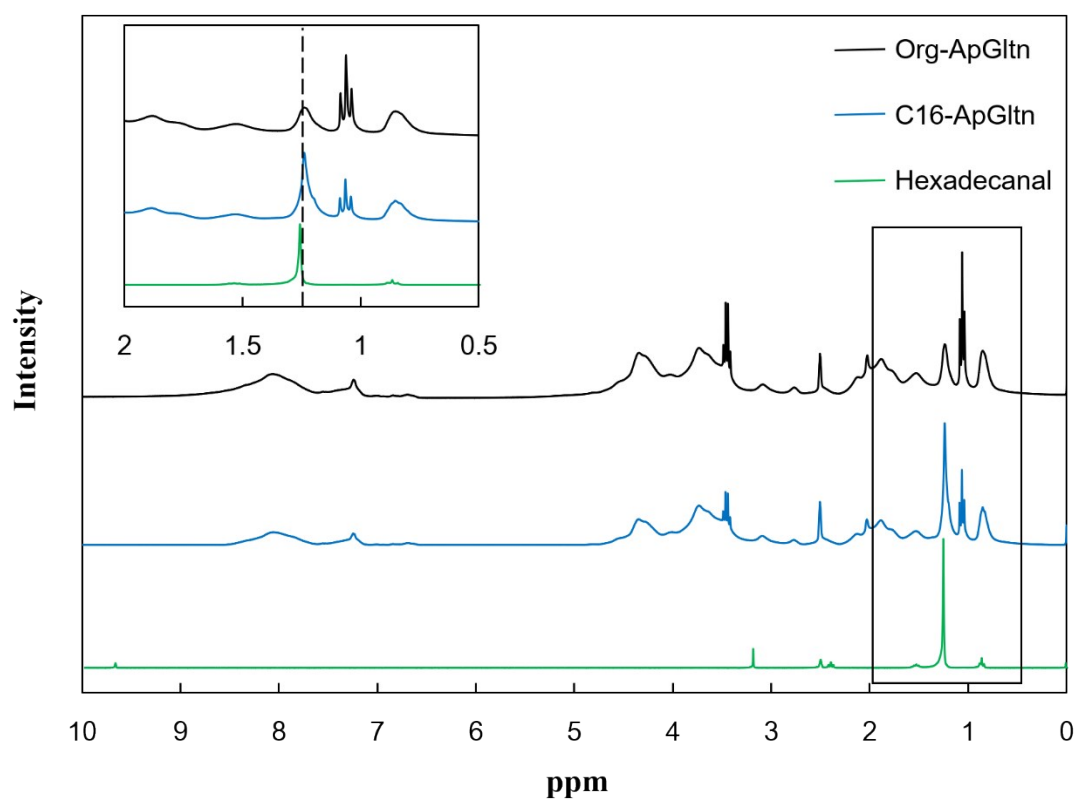

**Figure S2.** <sup>1</sup>H-NMR spectra of Org- and C16-ApGln. The inset graph indicates the magnified spectra of the boxed region.

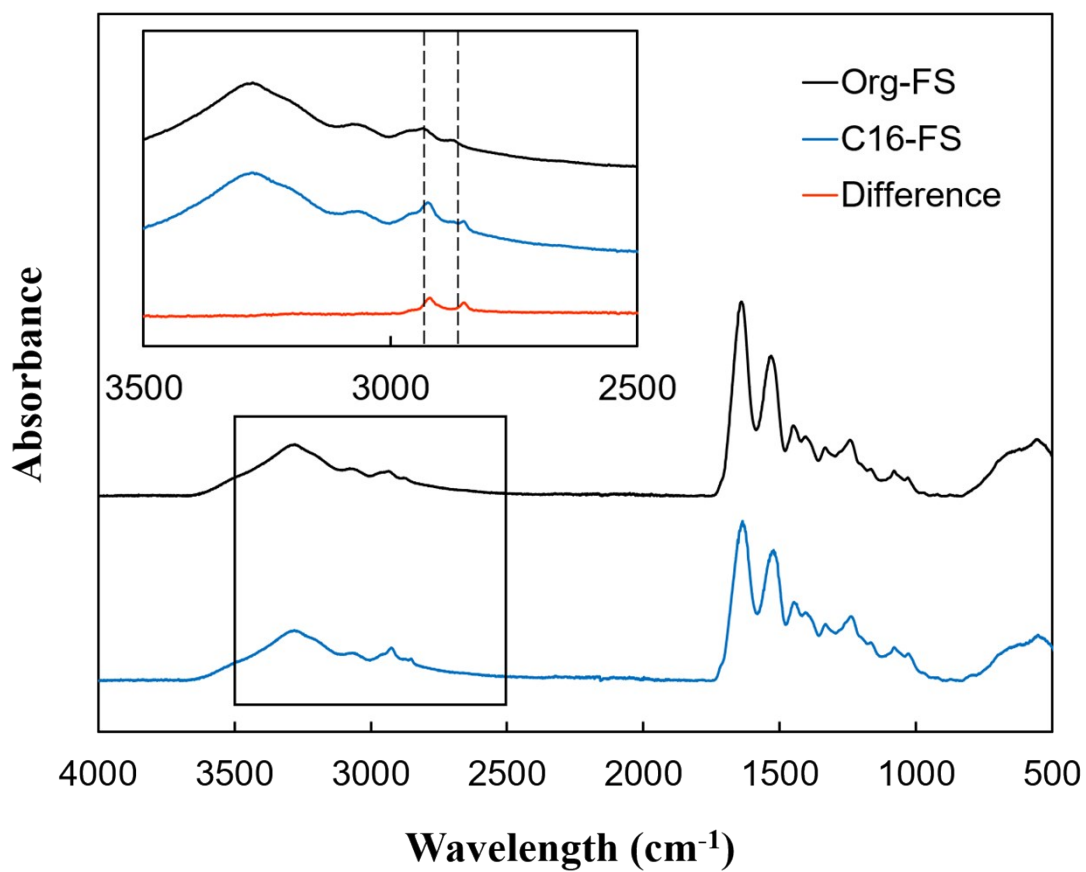

**Figure S3.** FT-IR spectra of Org- and C16-FS. (inset : magnified region in boxed area and the absorbance difference of Org- and C16-FS.)

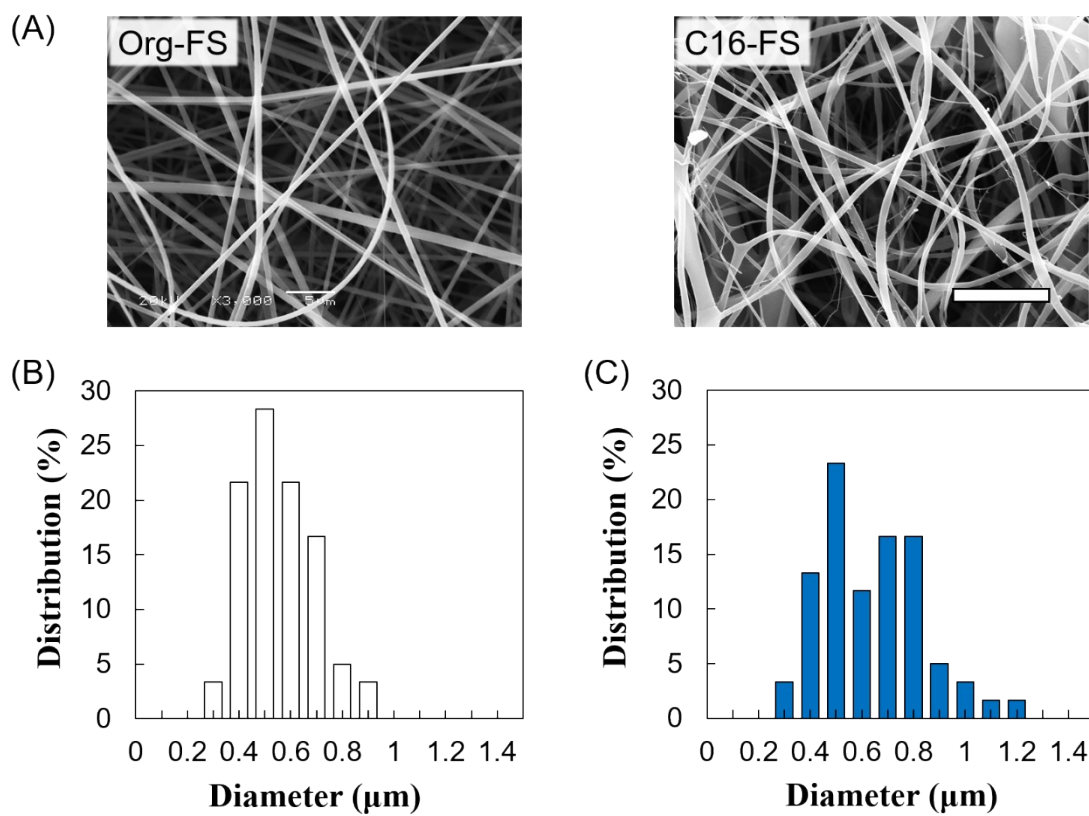

**Figure S4.** (A) SEM observation of Org- and C16-FS after the thermal crosslinking. ( $\times 3000$ ) Scale bar = 5  $\mu\text{m}$ . The fiber diameter histograms of (B) Org- and (C) C16-FS measured by Image J. ( $n=60$ ).

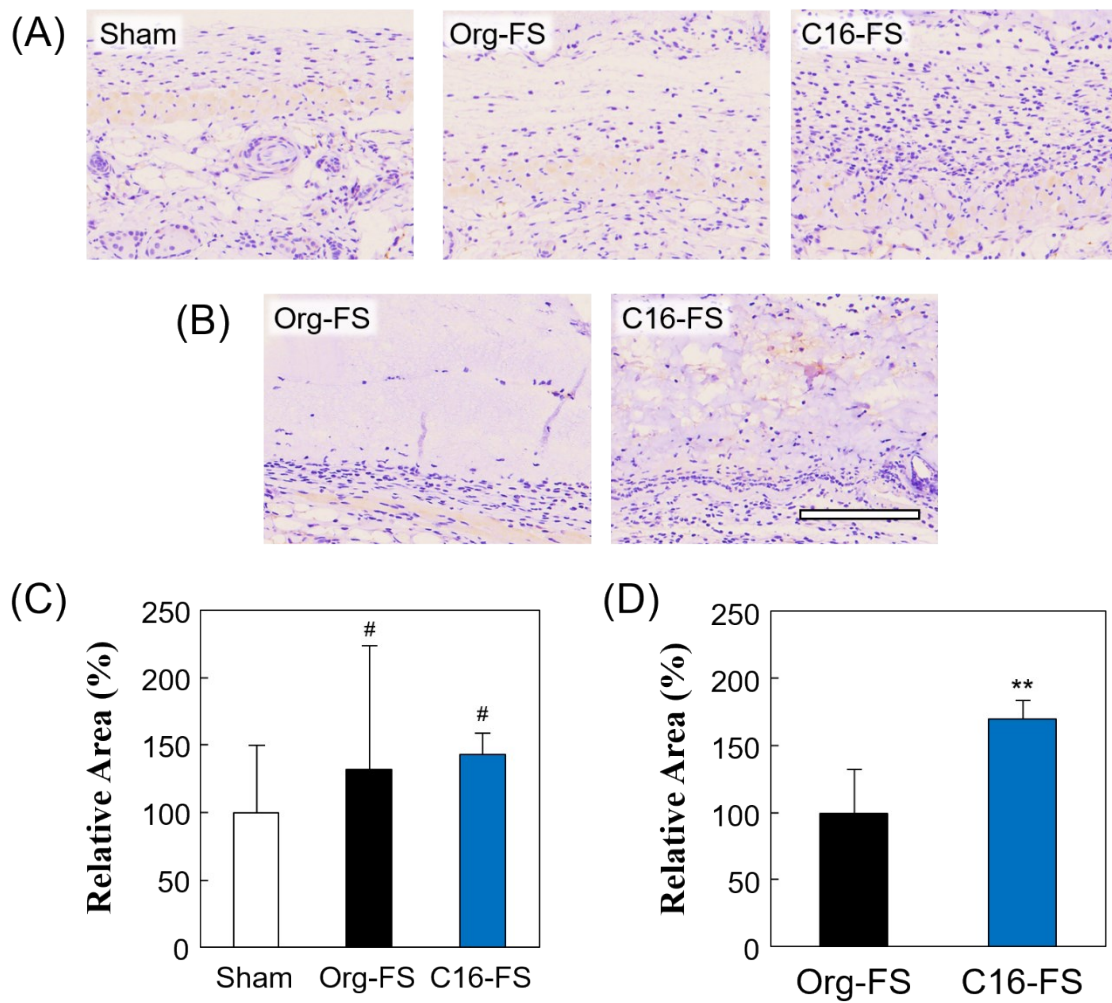

**Figure S5.** Evaluation of immunohistochemical expression of VEGF in (A) tissue and (B) FSs 3 days after the implantation of Org- and C16-FS. Scale bar = 200  $\mu$ m. The VEGF expressed area in tissue and FSs was shown in (C) and (D), respectively. (n=10)  $\#p>0.05$ ,  $**p<0.01$ .
